# Supplementary material for: Non-Coding RNAs and Adipogenesis
Source: MDPI journal article supplement (doi:10.3390/ijms24129978), 2023-06-10
Supplement: s1 [file s1]

## Supplement Table S1

### LncRNAs involved in adipogenesis and development

| LncRNA            | Cell              | Function                           | Year |
|-------------------|-------------------|------------------------------------|------|
| TINCR             | ADSCs             | Promote adipogenic differentiation | 2018 |
| HoxA11-AS1        | ADSCs             | Promote adipogenic differentiation | 2018 |
| Bmncr             | BMSC              | Inhibit adipogenesis               | 2018 |
| Plnc1             | BMSC              | Promote adipogenic differentiation | 2018 |
| Leptin            | Primary adipocyte | Promote adipocyte differentiation  | 2018 |
| AdipoQ AS         | Primary adipocyte | Inhibit adipogenesis               | 2018 |
| OAD               | 3T3-L1            | Promote adipogenic differentiation | 2019 |
| CAAInc1           | C3H10             | Inhibit adipogenesis               | 2019 |
| ORA               | 3T3-L1            | Promote adipogenesis               | 2019 |
| lincADAL          | ADSCs             | Promote adipocyte differentiation  | 2019 |
| PGC1 $\beta$ -OT1 | ST2               | Inhibit adipogenic differentiation | 2019 |
|                   | C3H10             |                                    |      |

---

|             |                         |                                    |      |
|-------------|-------------------------|------------------------------------|------|
| mouse MSCs  |                         |                                    |      |
| AC092834.1  | ADSCs                   | Inhibit adipogenic differentiation | 2020 |
| PVT1        | 3T3-L1                  | Promote adipogenic differentiation | 2020 |
| HCG11       | hAdMSCs                 | Inhibit adipogenic differentiation | 2020 |
| AD          | Preadipocyte in chicken | Inhibit adipogenesis               | 2020 |
| Adi         | ADSCs                   | Promote adipogenic differentiation | 2020 |
| MALAT1      | C3H10                   | Promote adipogenesis               | 2021 |
| LYPLAL1-AS1 | ADSCs                   | Promote adipogenic differentiation | 2021 |
| 13728       | ADSCs                   | Promote adipogenic differentiation | 2021 |
| FR332443    | 3T3-L1                  | Inhibit adipogenic differentiation | 2021 |
| SAMM50      | Buffalo Adipocytes      | Promote adipogenic differentiation | 2021 |
| RAP2        | Preadipocytes           | Promote adipogenesis               | 2022 |
| LIPE-AS1    | OP9                     | Promote adipogenic                 | 2022 |

---

---

|           |               |                      |      |
|-----------|---------------|----------------------|------|
|           |               | differentiation      |      |
| MIR99AHG  | 3T3-L1        | Promote adipocyte    | 2022 |
|           |               | differentiation      |      |
| NR.015556 | 3T3-L1        | Inhibit adipocyte    | 2022 |
|           | C3H10         | differentiation      |      |
| NEAT1     | BMSC          | Promote adipogenic   | 2022 |
|           |               | differentiation      |      |
| ACART     | 3T3-L1        | Promote adipocyte    | 2023 |
|           |               | differentiation      |      |
| PLAAT3    | Porcine       | Promote adipocyte    | 2023 |
|           | primary       | differentiation      |      |
|           | adipocyte     |                      |      |
| BIANCR    | Intramuscular | Promote adipogenesis | 2023 |
|           | preadipocytes |                      |      |
|           | in cattle     |                      |      |

---

**Supplement Table S2****MiRNAs involved in adipogenesis and development**

| <b>MiRNA</b>                | <b>Cell</b>           | <b>Function</b>                       | <b>Year</b> |
|-----------------------------|-----------------------|---------------------------------------|-------------|
| miR-220a                    | Yak<br>adipocytes     | Promote adipocyte<br>differentiation  | 2018        |
| miR-23a/27a/24-2<br>cluster | Bovine<br>adipocytes  | Inhibit<br>adipogenesis               | 2018        |
| miR-27b                     | 3T3-L1                | Promote adipocyte<br>differentiation  | 2019        |
| miR-425                     | 3T3-L1                | Promote adipocyte<br>differentiation  | 2019        |
| miR-130a                    | BMSCs                 | Inhibit adipogenic<br>differentiation | 2019        |
| miR-16-5p                   | 3T3-L1                | Promote adipocyte<br>differentiation  | 2019        |
| miR-18b-3p                  | Chicken<br>adipocytes | Inhibit adipocyte<br>differentiation  | 2019        |
| miR-204                     | 3T3-L1                | Promote adipocyte<br>differentiation  | 2019        |
| miR-107                     | SGBS                  | Inhibit<br>adipogenesis               | 2019        |
| miR-340-5p                  | Sheep                 | Inhibit adipocyte                     | 2020        |

---

|             |              |                    |      |
|-------------|--------------|--------------------|------|
|             | adipocytes   | differentiation    |      |
| miR-196b-5p | C3H10        | Promote            | 2020 |
|             | ST2          | adipogenesis       |      |
|             | BMSCs        |                    |      |
| miR-324-5p  | Mouse        | Promote adipocyte  | 2020 |
|             | adipocytes   | differentiation    |      |
| miR-451     | Porcine      | Inhibit adipogenic | 2020 |
|             | primary      | differentiation    |      |
|             | adipocyte    |                    |      |
| miR-345-5p  | 3T3-L1       | Inhibit adipocyte  | 2020 |
|             |              | differentiation    |      |
| miR-22      | 3T3-L1       | Promote adipocyte  | 2021 |
|             |              | differentiation    |      |
| miR-148a    | BMSCs        | Promote adipogenic | 2021 |
|             |              | differentiation    |      |
| miR-222/221 | 3T3-L1       | Promote            | 2021 |
|             |              | adipogenesis       |      |
| miR-370-3p  | 3T3-L1       | Inhibit adipocyte  | 2021 |
|             |              | differentiation    |      |
| miR-410-3p  | White        | Inhibit            | 2021 |
|             | preadipocyte | adipogenesis       |      |
| miR-669a-5p | C3H10        | Promote adipocyte  | 2022 |

---

---

|            |              |                   |      |
|------------|--------------|-------------------|------|
|            | 3T3-L1       | differentiation   |      |
| miR-23b    | Porcine      | Promote adipocyte | 2022 |
|            | preadipocyte | differentiation   |      |
| miR-140    | 3T3-L1       | Promote adipocyte | 2022 |
|            |              | differentiation   |      |
| miR-214    | Duck         | Promote adipocyte | 2022 |
|            | adipocyte    | differentiation   |      |
| miR-26a-5p | Porcine      | Inhibit adipocyte | 2023 |
|            | preadipocyte | differentiation   |      |
| miR-33a    | Bovine       | Inhibit adipocyte | 2023 |
|            | adipocytes   | differentiation   |      |

---

**Supplement Table S3****CircRNAs involved in adipogenesis and development**

| <b>CircRNA</b> | <b>Cell</b>   | <b>Function</b>    | <b>Year</b> |
|----------------|---------------|--------------------|-------------|
| circArhgap5-2  | Primary mouse | Promote            | 2019        |
|                | adipocyte     | adipogenesis       |             |
| circFUT10      | Bovine        | Inhibit adipocyte  | 2020        |
|                | adipocyte     | differentiation    |             |
| circ PLXNA1    | Duck          | Promote adipocyte  | 2020        |
|                | adipocyte     | differentiation    |             |
| circFLT1       | Bovine        | Promote adipocyte  | 2020        |
|                | adipocyte     | differentiation    |             |
| circH19        | hADSC         | Inhibit adipogenic | 2020        |
|                |               | differentiation    |             |
| circSAMD4A     | preadipocyte  | Promote adipocyte  | 2020        |
|                |               | differentiation    |             |
| circCDR1as     | BMSC          | Promote adipogenic | 2020        |
|                |               | differentiation    |             |
| circHIPK3      | HEPG2         | Promote adipose    | 2020        |
|                |               | deposition         |             |
| circPTK2       | Mouse white   | Inhibit            | 2021        |
|                | preadipocyte  | adipogenesis       |             |
| circATXN2      | Rat ADSC      | Promote            | 2021        |

---

|                   |                    |                    |      |
|-------------------|--------------------|--------------------|------|
|                   |                    | adipogenesis       |      |
| circPPAR $\gamma$ | Bovine             | Promote adipocyte  | 2022 |
|                   | adipocyte          | differentiation    |      |
| circBDP1          | Bovine             | Promote adipocyte  | 2022 |
|                   | adipocyte          | differentiation    |      |
| circMARK3         | 3T3-L1             | Promote adipocyte  | 2022 |
|                   | Buffalo adipocyte  | differentiation    |      |
| circ0006511       | Goat intramuscular | Promote adipocyte  | 2022 |
|                   | adipocyte          | differentiation    |      |
| circRNF111        | Bovine             | Promote adipocyte  | 2023 |
|                   | adipocyte          | differentiation    |      |
| circITGB1         | Sheep              | Inhibit adipocyte  | 2023 |
|                   | adipocyte          | differentiation    |      |
| circADAMTS16      | Bovine             | Inhibit adipocyte  | 2023 |
|                   | adipocyte          | differentiation    |      |
| circRBM23         | MSCs               | Inhibit adipogenic | 2023 |
|                   |                    | differentiation    |      |

---

\*ADSCs: Adipose-derived stem cells; BMSCs: Bone marrow mesenchymal stem cells; ST2, OP9: Murine bone marrow stromal cells; C3H10: Murine mesenchymal stem cell; MSCs: Mesenchymal stromal cells; hAdMSCs: Human adipose-derived mesenchymal stem cells; SGBS: human preadipocytes; HEPG2: Human hepatocellular carcinoma cells.
